# Supplementary material
Source: PubMed Central journal article supplement (PMC6126379)
Supplement: NIHMS984485-supplement-Supplement.pdf [file NIHMS984485-supplement-Supplement.pdf]

## Supplementary Materials

Koman, Patricia D., Kelly A. Hogan, Natalie Sampson, Rebecca Mandell, Chris M. Coombe, Myra M. Tetteh, Yolanda R. Hill-Ashford, et al. “Examining Joint Effects of Air Pollution Exposure and Social Determinants of Health in Defining ‘At-Risk’ Populations Under the Clean Air Act: Susceptibility of Pregnant Women to Hypertensive Disorders of Pregnancy.” *World Medical & Health Policy* 10, no. 1 (March 1, 2018): 7–54.  
<https://doi.org/10.1002/wmh3.257>.

**Table S1. Summary of Studies Examining Joint Effect of Air Pollution and Social Determinants of Health in Associations with HDP in U.S.**

| Study             | Location                                          | Study Design  | Population                                                                                                                                                                           | Covariates                                                                                                                                                                                                        | Social Stressors & Pre-Existing Chronic Conditions                                                                                                          | PM and Ozone Metric                                                                                                                                                                                                                                                                                                                                                           | Outcome(s)        | Interaction                                                     | Adjusted effect estimate /main findings (95% CI)                                                                                                                                                                                                                                                                                                                                                                                                                                                                                                                                                                                                                                                                                                                      |
|-------------------|---------------------------------------------------|---------------|--------------------------------------------------------------------------------------------------------------------------------------------------------------------------------------|-------------------------------------------------------------------------------------------------------------------------------------------------------------------------------------------------------------------|-------------------------------------------------------------------------------------------------------------------------------------------------------------|-------------------------------------------------------------------------------------------------------------------------------------------------------------------------------------------------------------------------------------------------------------------------------------------------------------------------------------------------------------------------------|-------------------|-----------------------------------------------------------------|-----------------------------------------------------------------------------------------------------------------------------------------------------------------------------------------------------------------------------------------------------------------------------------------------------------------------------------------------------------------------------------------------------------------------------------------------------------------------------------------------------------------------------------------------------------------------------------------------------------------------------------------------------------------------------------------------------------------------------------------------------------------------|
| Wu et al. 2009    | Los Angeles and Orange Counties, USA (1997 -2006) | Birth records | N=81,186 pregnancies (n=2,442 PE cases)<br>Included singleton births.<br>Excluded subjects with missing residential data                                                             | Age, education, race/ethnicity, diabetes, parity, prenatal care insurance type, poverty and season of conception                                                                                                  | Stratification by study region, race, poverty, insurance type, infant sex, maternal age, parity, delivery type and method, and health conditions (diabetes) | Modeled air quality using CALine4 line-source dispersion models with EMFAC2007 emissions model to estimate entire pregnancy traffic exposures <3 km from traffic, Mean traffic-related PM during entire pregnancy 1.82 µg/m <sup>3</sup> (SD 1.33) and IQR 1.35                                                                                                               | Preeclampsia (PE) | Race/ethnicity, poverty, diabetes status<br><br>Insurance payor | PM <sub>2.5</sub> CALINE4 OR 1.11 (1.06-1.15) per IQR traffic-PM <sub>2.5</sub> of 1.35 µg/m <sup>3</sup> during entire pregnancy. For pregnant women in the highest traffic exposure quartile, OR = 1.42 (1.26–1.59)<br><br>No significant differences in effect estimates when stratified by study region, race/ethnicity, poverty, infant sex, parity, delivery type (spontaneous vs. nonspontaneous), delivery method (vaginal vs. cesarean section), diabetes status (for PE), and PE (for preterm birth).<br><br>Although higher risk of PE was observed among privately insured women v. public or government-sponsored insurance, authors conclude confounding by age due to high percentage (83%) of older women (> 40 years of age) using private insurance |
| Wu et al. 2011    | Los Angeles and Orange Counties, USA (1997 -2006) | Birth records | N=81,186 pregnancies (n=2,442 PE cases)<br>Included singleton births.<br>Excluded subjects with missing residential data                                                             | Age, education, ethnicity, diabetes, parity, prenatal care insurance type, poverty and season of conception                                                                                                       | Stratification by study region, race, poverty, insurance type, infant sex, maternal age, and parity                                                         | Ambient monitored data, traffic density, and modeled traffic-related PM <sub>2.5</sub> and NOx using CALine4 line-source dispersion models to estimate entire pregnancy <3 km from traffic, Mean measured during entire pregnancy PM <sub>2.5</sub> 17.3 (SD 3.5) µg/m <sup>3</sup> , IQR 5.1, PM10 32.7 (SD 5.7) µg/m <sup>3</sup> , IQR 6.8, O3 35.6 (SD 7.5) ppb, IQR 11.5 | Preeclampsia (PE) | Race/ethnicity, poverty, insurance payor                        | Ozone OR per IQR entire pregnancy LA 1.00 (0.86, 1.16); Orange Co. 1.21 (1.06, 1.38)<br><br>PM <sub>2.5</sub> OR per IQR entire pregnancy LA 0.90 (0.79, 1.01); Orange Co. 0.98 (0.88, 1.09)<br><br>PM <sub>10</sub> OR per IQR entire pregnancy LA 0.97 (0.89, 1.07); Orange Co. 0.98 (0.91, 1.05)<br><br>PM <sub>2.5</sub> CALINE4 OR per IQR of 1.35 µg/m <sup>3</sup> entire pregnancy LA 1.08 (1.02, 1.15); Orange Co. 1.10 (1.04, 1.17)<br><br>No significant differences in effect estimates when stratified by study region, race/ethnicity, poverty, insurance payor, infant sex, or parity (detailed results not shown)                                                                                                                                     |
| Rudra et al. 2011 | Washington, USA (1996-2006 )                      | Birth cohort  | N=3,509 (n=117) Eligible subjects attending prenatal care before week 20. Excluded subjects with maternal age<18 years, non-English language and planned delivery outside study area | Age, education, ethnicity, parity, prepregnancy BMI, physical activity, employment, household income, marital status, history of asthma, diabetes or chronic hypertension, smoking, season and year of conception | Stratification by age, BMI (<25 kg/m <sup>2</sup> ), ever smoking and environmental tobacco smoke (ETS), employment                                         | Monthly modeled PM <sub>2.5</sub> from traffic counts, housing density, temperature and monitored air quality using geocoded participant residence                                                                                                                                                                                                                            | PE                | Obesity                                                         | Positive association with PM <sub>2.5</sub> , 1.02 (0.93 - 1.12); No interaction with BMI category (p-value not reported)                                                                                                                                                                                                                                                                                                                                                                                                                                                                                                                                                                                                                                             |

| Study                      | Location                                          | Study Design             | Population                                                                                                                                                                                                                                                             | Covariates                                                                                                                                                     | Social Stressors &                                                                                                                                                                                                                                                                                                                            |                                                                                                                                                    | Interaction                                                                                                                                                         | Adjusted effect estimate /main findings (95% CI)                                                                                                                                                                                                                                                                                                                                                                                                                                                                                                                                                                                                                                                                                                                                                                                                                                                                                               |
|----------------------------|---------------------------------------------------|--------------------------|------------------------------------------------------------------------------------------------------------------------------------------------------------------------------------------------------------------------------------------------------------------------|----------------------------------------------------------------------------------------------------------------------------------------------------------------|-----------------------------------------------------------------------------------------------------------------------------------------------------------------------------------------------------------------------------------------------------------------------------------------------------------------------------------------------|----------------------------------------------------------------------------------------------------------------------------------------------------|---------------------------------------------------------------------------------------------------------------------------------------------------------------------|------------------------------------------------------------------------------------------------------------------------------------------------------------------------------------------------------------------------------------------------------------------------------------------------------------------------------------------------------------------------------------------------------------------------------------------------------------------------------------------------------------------------------------------------------------------------------------------------------------------------------------------------------------------------------------------------------------------------------------------------------------------------------------------------------------------------------------------------------------------------------------------------------------------------------------------------|
|                            |                                                   |                          |                                                                                                                                                                                                                                                                        |                                                                                                                                                                | Pre-Existing Chronic Conditions                                                                                                                                                                                                                                                                                                               | PM and Ozone Metric                                                                                                                                |                                                                                                                                                                     |                                                                                                                                                                                                                                                                                                                                                                                                                                                                                                                                                                                                                                                                                                                                                                                                                                                                                                                                                |
| Vinikoor-Imler et al. 2012 | North Carolina, USA (2000-2003)                   | Birth records            | N=222,775 (n=12,085) Excluded multiple births, infants with congenital abnormalities, birth weight<42, missing covariates data and chronic hypertension                                                                                                                | Age, education, ethnicity, marital status, neighbourhood deprivation index, parity and smoking                                                                 | Interaction of PM and neighborhood deprivation index (NDI) category using loglikelihood test. NDI by census tract constructed from % households in poverty, % female-headed households, % households income <\$30,000, % households on public assistance, % males in management, % crowded households, % unemployed, % <high school education | Air pollution averaged over entire pregnancy and restricted to women residing within 20 km of PM monitor                                           | Gestational hypertension (GH)                                                                                                                                       | PM <sub>2.5</sub> RR for a IQR of 2.24 µg/m <sup>3</sup> 1.11 (1.08, 1.15)<br><br>PM <sub>10</sub> RR for a IQR of 3.92 µg/m <sup>3</sup> 1.07 (1.04, 1.11)<br><br>No interaction was present between NDI categories and PM <sub>2.5</sub> (p=0.24) using log likelihood test. An interaction was observed with PM <sub>10</sub> (p <0.05)<br>PM <sub>2.5</sub> RR for each IQR among women in areas with lowest NDI 1.08 (1.02, 1.14) and 1.12 (1.08, 1.17) for upper 75% of NDI<br>PM <sub>10</sub> RR for each IQR among women in areas with lowest NDI 1.02 (0.98, 1.07) and 1.10 (1.06, 1.14) for upper 75% NDI                                                                                                                                                                                                                                                                                                                           |
| Lee et al. 2012            | Pittsburgh (Allegheny County), PA USA (1997-2001) | Cohort, Hospital records | N=1,684 Excluded multiple births, women with chronic hypertension and/or diabetes, gestational age 45 weeks and residential location outside study area                                                                                                                | Age, race/ethnicity, parity, smoking (number of cigarettes), vitamin use, BMI, temperature, season of birth and year of conception from hospital-based records | SDOH: Stratification by race/ethnicity (Caucasian and African American)                                                                                                                                                                                                                                                                       | Ozone and PM using space/time kriging to estimate zip code level exposures for a trimester (12 weeks)                                              | Increase in systolic blood pressure (SBP) between 20 weeks and late pregnancy<br><br>Increase in diastolic blood pressure (DBP) between 20 weeks and late pregnancy | Ozone 1.47 (-0.10, 3.04)<br>PM <sub>2.5</sub> 0.40 (-0.66, 1.46)<br>PM <sub>10</sub> 1.18 (0.10, 2.26)<br>Ozone 0.74 (-0.48, 1.95)<br>PM <sub>2.5</sub> 0.38 (-0.41, 1.18)<br>PM <sub>10</sub> 0.48 (-0.35, 1.30)                                                                                                                                                                                                                                                                                                                                                                                                                                                                                                                                                                                                                                                                                                                              |
| Lee et al. 2013            | Pittsburgh (Allegheny County), PA USA (1997-2002) | Hospital records         | N=34,705; PE (n=1,141) and GH (n=2,078) Excluded multiple births, women with chronic hypertension and/or diabetes, gestational age 45 weeks and residential location outside study area; same as above study                                                           | Age, race/ethnicity, parity, smoking (number of cigarettes), season of birth and year of conception from hospital-based records                                | SDOH: Stratification by race/ethnicity (Caucasian and African American)                                                                                                                                                                                                                                                                       | Ozone and PM using space/time kriging to estimate zip code level exposures for a trimester (12 weeks)                                              | PE<br><br>GH                                                                                                                                                        | Ozone OR per IQR 1st trimester 1.12 (0.89, 1.42)<br>PM <sub>2.5</sub> OR per IQR 1st trimester 1.15 (0.96, 1.39)<br>PM <sub>10</sub> OR per IQR 1st trimester 1.00 (0.87, 1.15)<br>Ozone OR per IQR 1st trimester 1.12 (0.97, 1.29)<br>PM <sub>2.5</sub> OR per IQR 1st trimester 1.11 (1.00, 1.23)<br>PM <sub>10</sub> OR per IQR 1st trimester (1.08 (0.98, 1.20)<br><br>Because of insufficient sample size, interaction and effect measure modification not assessed between air pollution exposure and PE or GH for maternal race/ethnicity and smoking status during pregnancy. Sensitivity analyses stratifying by maternal race/ethnicity, smoking status, preterm delivery (for PE analysis). Although different effect estimates across all strata, effect estimates had wide 95% confidence intervals and thus lacked precision to draw conclusions concerning interaction.<br><br>No differences when stratified by race/ethnicity |
| Miranda et al. 2013        | North Carolina, USA (2004-2008)                   | Birth records            | N=468,517 (n=25,768) entire state; Included singleton births, subjects with birth number 1-4, non-Hispanic White, non-Hispanic Black, Hispanic, aged 15-40. Excluded infants with congenital anomalies, birth weight 42 and/or missing covariates; excluded women with | Age, education, race/ethnicity, marital status, parity, smoking, maternal nativity, season of birth, tract-level median income and urbanization                | SDOH: Controlled for as confounder, but did not directly test education, race/ethnicity, poverty (community census tract-level) income, population density; excluded women with chronic hypertension from study                                                                                                                               | PM mixture: Proximity to traffic measured by GIS residence <250 m, 250-500, >500m from roadway, traffic volume or density of roadways not included | PE and/or GH                                                                                                                                                        | Positive association where lower confidence limit includes 1.0; OR with PM mixture proximity to traffic for <250m 1.02 (0.97, 1.06), 250-500m 1.04 (1.00, 1.07) (p<0.1), >500m 1.02 (0.98, 1.06)                                                                                                                                                                                                                                                                                                                                                                                                                                                                                                                                                                                                                                                                                                                                               |

| Study                | Location                         | Study Design  | Population                                                                                                                                                                                                                                                           | Covariates                                                                                                                                                                                             | Social Stressors & Pre-Existing Chronic Conditions                                                                |                                                                                                                                                   | PM and Ozone Metric                                                                                                                                                                                                                                     | Outcome(s)                                | Inter-action      | Adjusted effect estimate /main findings (95% CI)                                                                       |                                                                                                                                                                                                                                                                                                                            |                                                                                                                                                                                                                                                                                                                                                              |
|----------------------|----------------------------------|---------------|----------------------------------------------------------------------------------------------------------------------------------------------------------------------------------------------------------------------------------------------------------------------|--------------------------------------------------------------------------------------------------------------------------------------------------------------------------------------------------------|-------------------------------------------------------------------------------------------------------------------|---------------------------------------------------------------------------------------------------------------------------------------------------|---------------------------------------------------------------------------------------------------------------------------------------------------------------------------------------------------------------------------------------------------------|-------------------------------------------|-------------------|------------------------------------------------------------------------------------------------------------------------|----------------------------------------------------------------------------------------------------------------------------------------------------------------------------------------------------------------------------------------------------------------------------------------------------------------------------|--------------------------------------------------------------------------------------------------------------------------------------------------------------------------------------------------------------------------------------------------------------------------------------------------------------------------------------------------------------|
|                      |                                  |               |                                                                                                                                                                                                                                                                      |                                                                                                                                                                                                        |                                                                                                                   |                                                                                                                                                   |                                                                                                                                                                                                                                                         |                                           |                   |                                                                                                                        |                                                                                                                                                                                                                                                                                                                            |                                                                                                                                                                                                                                                                                                                                                              |
| Mobasher et al. 2013 | Los Angeles, CA USA (1996-2008)  | Case-control  | N=298 (n=136) predominantly Hispanic women. Excluded multiple pregnancies, women with lupus, chronic renal disease, sickle cell disease or trait                                                                                                                     | Age, race/ethnicity, parity, exposure to second hand smoke, parity, smoking and year of conception                                                                                                     | Medical condition BMI: obesity category (BMI $\geq 30$ kg/m <sup>2</sup> )                                        | Likelihood ratio test for interaction between air pollution and BMI category                                                                      | Trimester averages constructed from 24-hour average based on residential address using EPA Air Quality System and the Southern California Children's Health Study. Ozone was correlated with PM <sub>2.5</sub> but uncorrelated with PM <sub>10</sub> . | Hypertensive disorders of pregnancy (HDP) |                   | Ozone OR 1st trimester 0.91 (0.54, 1.52); 2nd trimester 2.05 (1.22, 3.46), 3rd trimester 1.19 (0.71, 1.98)             |                                                                                                                                                                                                                                                                                                                            |                                                                                                                                                                                                                                                                                                                                                              |
|                      |                                  |               |                                                                                                                                                                                                                                                                      |                                                                                                                                                                                                        |                                                                                                                   |                                                                                                                                                   |                                                                                                                                                                                                                                                         |                                           |                   | PM <sub>2.5</sub> OR 1st trimester 3.94 (1.82, 8.55), 2nd trimester 1.86 (0.95, 3.63), 3rd trimester 1.44 (0.76, 2.70) |                                                                                                                                                                                                                                                                                                                            |                                                                                                                                                                                                                                                                                                                                                              |
|                      |                                  |               |                                                                                                                                                                                                                                                                      |                                                                                                                                                                                                        |                                                                                                                   |                                                                                                                                                   |                                                                                                                                                                                                                                                         |                                           |                   | PM <sub>10</sub> OR 1st trimester 0.76 (0.43, 1.36), 2nd trimester 0.76 (0.44, 1.32), 3rd trimester 1.41 (0.77, 2.57)  |                                                                                                                                                                                                                                                                                                                            |                                                                                                                                                                                                                                                                                                                                                              |
|                      |                                  |               |                                                                                                                                                                                                                                                                      | Age, exposure to second hand smoke, parity, smoking and year of conception, BMI (note 17 missing BMI measures); chronic hypertension, diabetes, or asthma measured but not included in reported models |                                                                                                                   |                                                                                                                                                   |                                                                                                                                                                                                                                                         | HDP                                       | Obesity and Ozone | P-value interaction p=0.17 in first trimester; OR 0.68 (0.36, 1.29) among nonobese and 1.42 (0.44, 4.57) among obese   |                                                                                                                                                                                                                                                                                                                            |                                                                                                                                                                                                                                                                                                                                                              |
|                      |                                  |               |                                                                                                                                                                                                                                                                      |                                                                                                                                                                                                        |                                                                                                                   |                                                                                                                                                   |                                                                                                                                                                                                                                                         |                                           | HDP               | Obesity and PM <sub>2.5</sub>                                                                                          | P-value interaction p=0.06 in first trimester; OR 8.63 (3.10, 24.14) among nonobese and 0.72 (0.14, 3.56) among obese                                                                                                                                                                                                      |                                                                                                                                                                                                                                                                                                                                                              |
|                      |                                  |               |                                                                                                                                                                                                                                                                      |                                                                                                                                                                                                        |                                                                                                                   |                                                                                                                                                   |                                                                                                                                                                                                                                                         |                                           |                   | Obesity and PM <sub>10</sub>                                                                                           | P-value interaction p=0.97 in first trimester; OR 0.75 (0.36, 1.55) among nonobese and 0.89 (0.26, 3.09) among obese                                                                                                                                                                                                       |                                                                                                                                                                                                                                                                                                                                                              |
| Xu et al. 2014       | Jacksonville, FL USA (2004-2005) | Birth records | N=22,041 (n=1,037) Included live born singleton births. Excluded infants with congenital abnormalities, low birth weight, gestational age <24 weeks or >42 weeks, previous preterm birth, chronic hypertension, missing residential data and living far from monitor | Age, ethnicity, education, marital status, prenatal care, season of conception, smoking and track median household income                                                                              | Multiple pollutants at low concentrations, and stratified by race/ethnicity, diabetes status, and education level | Closest EPA AQS monitor <20 km distance (note only 2 active PM <sub>2.5</sub> and 2 ozone monitors); ozone and PM <sub>2.5</sub> correlation 0.20 |                                                                                                                                                                                                                                                         | HDP                                       |                   | Ozone OR for IQR 1st trimester 1.00 (0.84, 1.19), 2nd trimester 0.94 (0.82, 1.07), entire pregnancy 0.98 (0.87-1.11)   |                                                                                                                                                                                                                                                                                                                            |                                                                                                                                                                                                                                                                                                                                                              |
|                      |                                  |               |                                                                                                                                                                                                                                                                      |                                                                                                                                                                                                        |                                                                                                                   |                                                                                                                                                   |                                                                                                                                                                                                                                                         |                                           |                   |                                                                                                                        | PM <sub>2.5</sub> OR for IQR 1st trimester 1.10 (0.99, 1.23), 2nd trimester 1.28 (1.13, 1.46), entire pregnancy 1.24 (1.08, 1.43)                                                                                                                                                                                          |                                                                                                                                                                                                                                                                                                                                                              |
|                      |                                  |               |                                                                                                                                                                                                                                                                      |                                                                                                                                                                                                        |                                                                                                                   |                                                                                                                                                   |                                                                                                                                                                                                                                                         |                                           |                   |                                                                                                                        | Two pollutant models of ozone and PM <sub>2.5</sub> : OR for IQR increase 1st trimester ozone 1.05(0.87-1.26), 2nd trimester 1.03(0.89-1.18), entire pregnancy 1.03(0.89-1.18); OR for IQR increase PM <sub>2.5</sub> 1st trimester 1.11 (0.99, 1.25), 2nd trimester 1.30 (1.13, 1.48), entire pregnancy 1.25 (1.08, 1.44) |                                                                                                                                                                                                                                                                                                                                                              |
|                      |                                  |               |                                                                                                                                                                                                                                                                      |                                                                                                                                                                                                        |                                                                                                                   |                                                                                                                                                   |                                                                                                                                                                                                                                                         |                                           |                   |                                                                                                                        | Ozone no associations in any race category in adjusted models for 1st or second trimester or entire pregnancy                                                                                                                                                                                                              |                                                                                                                                                                                                                                                                                                                                                              |
|                      |                                  |               |                                                                                                                                                                                                                                                                      |                                                                                                                                                                                                        |                                                                                                                   |                                                                                                                                                   |                                                                                                                                                                                                                                                         |                                           |                   | HDP                                                                                                                    | Ozone with race/ ethnicity                                                                                                                                                                                                                                                                                                 |                                                                                                                                                                                                                                                                                                                                                              |
|                      |                                  |               |                                                                                                                                                                                                                                                                      |                                                                                                                                                                                                        |                                                                                                                   |                                                                                                                                                   |                                                                                                                                                                                                                                                         |                                           |                   |                                                                                                                        | PM <sub>2.5</sub> with race/ ethnicity                                                                                                                                                                                                                                                                                     | PM <sub>2.5</sub> OR for entire pregnancy among non-Hispanic White 1.35 (1.13, 1.61), no association among non-Hispanic Black 1.00 (0.080, 1.26), and Others 1.59 (1.04, 2.44); Similar but nonsignificant results for 1st trimester; 2nd trimester non-Hispanic White 1.29 (1.10, 1.52), non-Hispanic Black 1.16 (0.94, 1.43), and Others 1.80 (1.20, 2.71) |
|                      |                                  |               |                                                                                                                                                                                                                                                                      |                                                                                                                                                                                                        |                                                                                                                   |                                                                                                                                                   |                                                                                                                                                                                                                                                         |                                           |                   |                                                                                                                        | Ozone with education                                                                                                                                                                                                                                                                                                       | Ozone no associations in any education category in adjusted models for 1st or second trimester or entire pregnancy                                                                                                                                                                                                                                           |
|                      |                                  |               |                                                                                                                                                                                                                                                                      |                                                                                                                                                                                                        |                                                                                                                   |                                                                                                                                                   |                                                                                                                                                                                                                                                         |                                           |                   |                                                                                                                        | PM <sub>2.5</sub> with education                                                                                                                                                                                                                                                                                           | PM <sub>2.5</sub> OR entire pregnancy < HS 1.10 (0.79, 1.54), HS 1.18 (0.93, 1.49), > HS 1.32 (1.10, 1.58); 1st trimester < HS 1.08 (0.83, 1.39) HS 0.98 (0.81, 1.17), > HS 1.19 (1.03, 1.37); 2nd trimester <HS 1.16 (0.83, 1.62), HS 1.31 (1.05, 1.63), > HS 1.30 (1.05, 1.63)                                                                             |
|                      |                                  |               |                                                                                                                                                                                                                                                                      |                                                                                                                                                                                                        |                                                                                                                   |                                                                                                                                                   |                                                                                                                                                                                                                                                         |                                           |                   |                                                                                                                        | Ozone with gestational diabetes                                                                                                                                                                                                                                                                                            | Ozone OR entire pregnancy among those with GD 1.53 (0.92, 2.61) v. nonGD 0.95 (0.85, 1.08); 1st trimester with GD 1.09 (0.56, 2.20) v. nonGD 0.99 (0.83, 1.19); 2nd trimester with GD 1.18 (0.68, 2.01) v. nonGD 0.92 (0.80, 1.05)                                                                                                                           |
|                      |                                  |               |                                                                                                                                                                                                                                                                      |                                                                                                                                                                                                        |                                                                                                                   |                                                                                                                                                   |                                                                                                                                                                                                                                                         |                                           |                   |                                                                                                                        | PM <sub>2.5</sub> with gestational diabetes                                                                                                                                                                                                                                                                                | PM <sub>2.5</sub> OR entire pregnancy among those with GD 1.45 (0.82, 2.64) v. nonGD 1.23 (1.06, 1.42); 1st trimester with GD 1.53 (0.96, 2.50) v. nonGD 1.08 (0.96, 1.21); 2nd trimester with GD 1.05 (0.65, 1.69) v. 1.31 (1.15, 1.49)                                                                                                                     |

| Study                | Location                                                                                  | Study Design                                                                                            | Population                                                                                                                                                                                                                                       | Covariates                                                                                                                                                                                                                                                                                                                                                                                                                                                                                                                                                                                                                | Social Stressors & Pre-Existing Chronic Conditions                                                                                                                                                                                                                                                                                                             |                                                                                                                                                                                                                                                                                                                                                                                                                                                                                                                                       | PM and Ozone Metric                                                                                                                                                                                                                                                                                                                                                                                                                                                                               | Outcome(s) | Interaction                                                                                                                                                                                                                                                                                                                                                                                                                                                                                                                                                                                                                                                                                                                                                                                                                                                                                                                                                                                                                                                                                                                                                                                                                                                                                                                                                                                                                  | Adjusted effect estimate /main findings (95% CI) |
|----------------------|-------------------------------------------------------------------------------------------|---------------------------------------------------------------------------------------------------------|--------------------------------------------------------------------------------------------------------------------------------------------------------------------------------------------------------------------------------------------------|---------------------------------------------------------------------------------------------------------------------------------------------------------------------------------------------------------------------------------------------------------------------------------------------------------------------------------------------------------------------------------------------------------------------------------------------------------------------------------------------------------------------------------------------------------------------------------------------------------------------------|----------------------------------------------------------------------------------------------------------------------------------------------------------------------------------------------------------------------------------------------------------------------------------------------------------------------------------------------------------------|---------------------------------------------------------------------------------------------------------------------------------------------------------------------------------------------------------------------------------------------------------------------------------------------------------------------------------------------------------------------------------------------------------------------------------------------------------------------------------------------------------------------------------------|---------------------------------------------------------------------------------------------------------------------------------------------------------------------------------------------------------------------------------------------------------------------------------------------------------------------------------------------------------------------------------------------------------------------------------------------------------------------------------------------------|------------|------------------------------------------------------------------------------------------------------------------------------------------------------------------------------------------------------------------------------------------------------------------------------------------------------------------------------------------------------------------------------------------------------------------------------------------------------------------------------------------------------------------------------------------------------------------------------------------------------------------------------------------------------------------------------------------------------------------------------------------------------------------------------------------------------------------------------------------------------------------------------------------------------------------------------------------------------------------------------------------------------------------------------------------------------------------------------------------------------------------------------------------------------------------------------------------------------------------------------------------------------------------------------------------------------------------------------------------------------------------------------------------------------------------------------|--------------------------------------------------|
|                      |                                                                                           |                                                                                                         |                                                                                                                                                                                                                                                  |                                                                                                                                                                                                                                                                                                                                                                                                                                                                                                                                                                                                                           |                                                                                                                                                                                                                                                                                                                                                                |                                                                                                                                                                                                                                                                                                                                                                                                                                                                                                                                       |                                                                                                                                                                                                                                                                                                                                                                                                                                                                                                   |            |                                                                                                                                                                                                                                                                                                                                                                                                                                                                                                                                                                                                                                                                                                                                                                                                                                                                                                                                                                                                                                                                                                                                                                                                                                                                                                                                                                                                                              |                                                  |
| Savitz et al. 2015   | New York City, NY USA (2008-2010)                                                         | Hospital discharge records                                                                              | N=268,601; mild PE n=6,940, severe PE n=4,226, GH n =5,834, and total HDP n=17,000; from 41 hospitals excluded smokers and those with chronic hypertension and multiple births                                                                   | Age, parity (0, 1, or ≥ 2), conception year, body mass index (BMI), BMI <sup>2</sup> , and Medicaid status as proxy for SES, hospital, social deprivation index                                                                                                                                                                                                                                                                                                                                                                                                                                                           | Medical condition: BMI, SDOH: education, SES (based on government insurance eligibility), social deprivation index (SDI). SDI was comprised of % with college degree, % unemployment, % management/professional occupation, % residential crowding, % below 200% of the federal poverty line, % of households receiving public assistance, and % nonwhite race | PM <sub>2.5</sub> at maternal residence by trimester from New York City Community Air Survey using 150 monitoring stations combined with land use regression model using kriging. SDI are weakly negatively correlated with PM <sub>2.5</sub> in New York                                                                                                                                                                                                                                                                             | mild PE<br><br>Severe PE<br><br>GH<br><br>Total hypertensive disorders of pregnancy (HDP)                                                                                                                                                                                                                                                                                                                                                                                                         |            | Main adjusted effect PM <sub>2.5</sub> no association in the first or second trimester for mild PE; negative association for mild PE but the addition of hospital attenuated results. 1st trimester OR per 10 µg/m <sup>3</sup> : mild PE 0.82 (0.73, 0.92), mild PE with hospital adjustment 0.88 (0.78, 1.0); 2nd trimester OR: mild PE 0.8 (0.7, 0.9), mild PE with hospital adjustment 0.91 (0.80, 1.0)<br><br>Main adjusted effect PM <sub>2.5</sub> positive association but lower CI crosses 1.0 for exposures in the first and second trimesters for severe PE; the addition of hospital attenuated results. 1st trimester OR per 10 µg/m <sup>3</sup> : severe PE 1.1 (0.91, 1.2), severe PE with hospital adjustment 0.95 (0.82, 1.1); 2nd trimester OR: severe PE 1.1 (0.93, 1.3), severe PE with hospital adjustment 0.92 (0.74, 1.1)<br><br>Main adjusted effect PM <sub>2.5</sub> positive association in the first or second trimester, but the addition of hospital attenuated results. 1st trimester OR per 10 µg/m <sup>3</sup> : 1.7 (1.5, 1.0), 2nd trimester OR: 1.6 (1.4, 1.8)<br><br>Main adjusted effect PM <sub>2.5</sub> positive association with lower confidence bound crossing 1.0 for HDP in the first and second trimester but the addition of hospital attenuated results. 1st trimester OR per 10 µg/m <sup>3</sup> : Total HDP 1.1 (1.0, 1.2), 2nd trimester OR: Total HDP 1.1 (1.0, 1.2) |                                                  |
| Männistö et al. 2015 | 12 centers (19 hospitals; 15 hospital referral regions) across USA <sup>a</sup> 2002–2008 | retrospective cohort; ordinal logistic regression for odds of being in a higher blood pressure category | N=151,276 births at ≥23 weeks gestation assembled using hospital delivery admission electronic medical records (both mother and neonate charts) excluded multifetal pregnancies, deliveris <37 weeks, women with eclampsia and missing variables | Age, race/ethnicity (non-Hispanic White, non-Hispanic Black, Hispanic, Asian/Pacific Islander, Other, Unknown), pre-pregnancy BMI category (underweight <18.5, normal weight 18.5 to <25 kg/m <sup>2</sup> , overweight 25 to <30 kg/m <sup>2</sup> , obese 30 to 34.9 kg/m <sup>2</sup> , severely obese > 35.0 kg/m <sup>2</sup> , unknown), nulliparous, insurance status (public/self-pay, private, other, unknown), smoking during pregnancy, antihypertensive medication use, admission time, site, spontaneous labor, and number of pregnancies in the cohort were all derived from the electronic medical records | Medical condition: Modeled interaction between hypertensive disorder diagnosis and air pollution<br><br>Medical condition of GE, PE, Chronic hypertension or superimposed PE (both hypertension from different cause and PE)                                                                                                                                   | Ozone, PM <sub>2.5</sub> , PM <sub>10</sub> , elemental carbon, NO <sub>x</sub> , SO <sub>2</sub> , CO<br><br>Modeled pollution with Community Multi-Scale Air Quality (CMAQ) 36 km grid; 0-4 hour pre-admission period; Hourly exposure estimates were averaged across the delivery hospital referral region and weighted for population density to estimate windows of exposure for each pregnancy as a proxy for maternal residence and local mobility. The size of hospital referral regions ranged from 415 to 312,644 square km | Hypertensive blood pressure upon admission to labor and delivery<br><br>Among those with GH, odds of higher BP category upon admission after air pollution exposure<br><br>Among those with PE, odds of higher BP category upon admission after air pollution exposure<br><br>Among those with chronic HT, odds of higher BP category upon admission after air pollution exposure<br><br>Among those with Superimposed PE, odds of higher BP category upon admission after air pollution exposure |            | No association among normal-tensive women for ozone (OR 4-hour lag 0.997 (0.993–1.0) per 5 ppm), PM <sub>2.5</sub> (OR 4-hour lag 1.000 (0.999–1.002) per 1 µg/m <sup>3</sup> ) or PM <sub>10</sub> (OR 4-hour lag 0.998 (0.993–1.002)) ; 1.002(1.001 - 1.003) for 1 µg/m <sup>3</sup> nitrate (for all lags) and 0.998 (0.998 - 0.999) sulfates<br><br>No significant differences (in those with GH) BP RR from normal tensive women: for 4-hr Ozone with GH 0.98 (0.963–0.998), PM <sub>2.5</sub> 1.005 (0.997, 1.014), PM <sub>10</sub> 1.015 (0.99, 1.041)<br><br>RR for 4-hr ozone with PE 0.979 (0.965, 0.993) (interaction p<0.05); PM <sub>2.5</sub> 1.003 (0.997, 1.009), PM <sub>10</sub> 1.025 (1.003, 1.047) (interaction P<0.05)<br><br>No significant differences (in those with chronic HT) BP RR from normal tensive women: for 4-hr ozone with HT 1.013 (0.988–1.038), PM <sub>2.5</sub> 0.998 (0.998, 1.008), PM <sub>10</sub> 0.986 (0.952, 1.020)<br><br>RR for 4-hr ozone with Superimposed PE 1.080 (1.029, 1.132) (interaction p<0.05); and no significant differences PM <sub>2.5</sub> 1.015 (0.995, 1.036), PM <sub>10</sub> 1.043 (0.964, 1.129)                                                                                                                                                                                                                                                  |                                                  |

| Study                                                                                   | Location                                                                                    | Study Design         | Population                                                                                                                                      | Covariates                                                                                                                                                                                                                                                                                                                                                                                                                                                  | Social Stressors &                    |                                                                                                                                                                                                                                                                                                                                                                                                                                                  | Outcome(s)                                                                         | Inter-action                                                                                                                                                                                                                                                                                                                                                                                                                                                                                                                                                                                                                                                                                                                                                | Adjusted effect estimate /main findings (95% CI) |
|-----------------------------------------------------------------------------------------|---------------------------------------------------------------------------------------------|----------------------|-------------------------------------------------------------------------------------------------------------------------------------------------|-------------------------------------------------------------------------------------------------------------------------------------------------------------------------------------------------------------------------------------------------------------------------------------------------------------------------------------------------------------------------------------------------------------------------------------------------------------|---------------------------------------|--------------------------------------------------------------------------------------------------------------------------------------------------------------------------------------------------------------------------------------------------------------------------------------------------------------------------------------------------------------------------------------------------------------------------------------------------|------------------------------------------------------------------------------------|-------------------------------------------------------------------------------------------------------------------------------------------------------------------------------------------------------------------------------------------------------------------------------------------------------------------------------------------------------------------------------------------------------------------------------------------------------------------------------------------------------------------------------------------------------------------------------------------------------------------------------------------------------------------------------------------------------------------------------------------------------------|--------------------------------------------------|
|                                                                                         |                                                                                             |                      |                                                                                                                                                 |                                                                                                                                                                                                                                                                                                                                                                                                                                                             | Pre-Existing Chronic Conditions       | PM and Ozone Metric                                                                                                                                                                                                                                                                                                                                                                                                                              |                                                                                    |                                                                                                                                                                                                                                                                                                                                                                                                                                                                                                                                                                                                                                                                                                                                                             |                                                  |
| Mendola et al. 2016 Consortium on Safe Labor/ Air Quality and Reproductive Health Study | 12 centers (19 hospitals; 15 hospital referral regions) across USA <sup>a</sup> (2002–2008) | retrospective cohort | N=210,508 births at ≥23 weeks gestation assembled using hospital delivery admission electronic medical records (both mother and neonate charts) | Age, race/ethnicity (White, Black, Hispanic, Asian/Pacific Islander, Other/Unknown), pre-pregnancy BMI category (underweight <18.5, normal weight 18.5 to <25, overweight 25 to <30, obese ≥30, unknown), parity (nulliparous, primiparous, multiparous), marital status (married, divorced/widowed, single, unknown), insurance status (public, private, other, unknown), smoking and alcohol use during pregnancy (both yes/no) were all derived from the | Medical condition: asthma and obesity | Ozone, PM <sub>2.5</sub> , PM <sub>10</sub> , elemental carbon, NO <sub>x</sub> , SO <sub>2</sub> , CO<br><br>Modeled pollution with CMAQ 36 km grid; Hourly exposure estimates were averaged across the delivery hospital referral region and weighted for population density to estimate windows of exposure for each pregnancy as a proxy for maternal residence and local mobility. The size of hospital referral regions ranged from 415 to | Among those with asthma, RR of PE per IQR increase in air pollution<br><br>Obesity | RR over entire pregnancy for IQR ozone with asthma 0.98 (0.88–1.09) was not significantly different from pregnant women with no asthma 0.95 (0.91–1.01). Similar lack of association for preconception and each trimester as exposure<br><br>RR over entire pregnancy for IQR PM <sub>2.5</sub> with asthma 1.07 (0.93–1.24) was not significantly different from pregnant women with no asthma 1.02 (0.94–1.11). Similar lack of association for preconception and each trimester as exposure window. Elemental carbon RR over entire pregnancy was significantly different for those with and without asthma (p<0.05) 1.11 (1.03–1.21) with asthma and 1.03 (0.99–1.06) without asthma<br>Authors stratified by obesity status but did not report results |                                                  |

<sup>a</sup>Consortium on Safe Labor include Baystate Medical Center, Springfield, MA; Cedars-Sinai Medical Center Burnes Allen Research Center, Los Angeles, CA; Christiana Care Health System, Newark, DE; Georgetown University Hospital, MedStar Health, Washington, DC; Indiana University Clarian Health, Indianapolis, IN; Intermountain Healthcare and the University of Utah, Salt Lake City, Utah Maimonides Medical Center, Brooklyn, NY; MetroHealth Medical Center, Cleveland, OH.; Summa Health System, Akron City Hospital, Akron, OH; The EMMES Corporation, Rockville MD (Data Coordinating Center); University of Illinois at Chicago, Chicago, IL; University of Miami, Miami, FL; and University of Texas Health Science Center at Houston, Houston, Texas.

**Table S2. Exposure Assessment and Case Ascertainment Methods by Study**

| Study             | Social Factors and Pre-Existing Medical Conditions                          | Exposure Assessment of Social Factors                                                                                                         | PM and Ozone Metric                                                                                                                                                                                                                                                                                                                                                                                                   | Exposure Assessment of Air Pollution Metric                                                                                                                                                                                                                                                                                                                                                                                                                                                                                                                                                                                                                                                                                                                                                                                                                                                                        | Outcome(s)        | Case Ascertainment Method                                                                                                                                                                                                                                        |
|-------------------|-----------------------------------------------------------------------------|-----------------------------------------------------------------------------------------------------------------------------------------------|-----------------------------------------------------------------------------------------------------------------------------------------------------------------------------------------------------------------------------------------------------------------------------------------------------------------------------------------------------------------------------------------------------------------------|--------------------------------------------------------------------------------------------------------------------------------------------------------------------------------------------------------------------------------------------------------------------------------------------------------------------------------------------------------------------------------------------------------------------------------------------------------------------------------------------------------------------------------------------------------------------------------------------------------------------------------------------------------------------------------------------------------------------------------------------------------------------------------------------------------------------------------------------------------------------------------------------------------------------|-------------------|------------------------------------------------------------------------------------------------------------------------------------------------------------------------------------------------------------------------------------------------------------------|
| Wu et al. 2009    | Stratification by study region, race, poverty, insurance type, and diabetes | Used US Census 2000 data for poverty; hospital-based birth database from Memorial Health Care System (4 hospital network)                     | Modeled air quality using CALine4 line-source dispersion models with EMFAC2007 emissions model to estimate entire pregnancy traffic exposures <3 km from traffic; mean traffic-related PM during entire pregnancy 1.82 µg/m <sup>3</sup> (SD 1.33) and IQR 1.35 µg/m <sup>3</sup>                                                                                                                                     | CALine4 is a Gaussian dispersion model that employs a mixing zone concept to characterize dispersion over the roadway; other ambient pollution would not be well-characterized; CALine4 estimates compared with ambient measurements with moderate to high (R=0.55 to 0.95) correlations with NO <sub>x</sub> ; PM is not reported, but other studies observe systematic underestimates of traffic-related PM <sub>2.5</sub> (Kang and Batterman 2010). Detailed annual average traffic counts, vehicle fractions and road conditions were included; hourly windspeed and direction were employed. Modeling provides estimate of pollution exposures within 3 km and full temporal estimates. Assignment of maternal exposure were based solely on maternal address at time of birth, and this study's findings may be more affected by residential mobility than other studies because of the spatial resolution. | Preeclampsia (PE) | Hospital-based birth database from Memorial Health Care System (4 hospital network) which is considered superior to birth certificate records; used combination of date of last menstrual period and ultrasound data; diagnosis dates for PE onset not available |
| Wu et al. 2011    | Stratification by study region, race, poverty, and insurance type           | Used US Census 2000 data for poverty; hospital-based birth database from Memorial Health Care System (4 hospital network)                     | Ambient monitored data, traffic density, and modeled traffic-related PM <sub>2.5</sub> and NO <sub>x</sub> using CALine4 line-source dispersion models to estimate entire pregnancy <3 km from traffic; mean measured during entire pregnancy PM <sub>2.5</sub> 17.3 (SD 3.5) µg/m <sup>3</sup> , IQR 5.1, PM <sub>10</sub> 32.7 (SD 5.7) µg/m <sup>3</sup> , IQR 6.8, O <sub>3</sub> 35.6 (SD 7.5) ppb, IQR 11.5 ppb | PM is estimated only from CALINE4 (See above entry)                                                                                                                                                                                                                                                                                                                                                                                                                                                                                                                                                                                                                                                                                                                                                                                                                                                                | PE                | Hospital-based birth database from Memorial Health Care System (4 hospital network) which is considered superior to birth certificate records; used combination of date of last menstrual period and ultrasound data; diagnosis dates for PE onset not available |
| Rudra et al. 2011 | Stratification by BMI (<25 kg/m <sup>2</sup> )                              | Used data from the Omega Study (Butler et al. 2004) with questionnaire and hospital records for anthropometric, behavioral and medical traits | Monthly modeled PM <sub>2.5</sub> from traffic counts, housing density, temperature, and monitored air quality using geocoded participant residence                                                                                                                                                                                                                                                                   | Created monthly averages based on maternal PE residence and pollution model with R <sup>2</sup> of 0.41 and root mean square error of 2.5 µg/m <sup>3</sup> (10% of range)                                                                                                                                                                                                                                                                                                                                                                                                                                                                                                                                                                                                                                                                                                                                         | PE                | Used data from the Omega Study (Butler et al. 2004) defining PE as ACOG criteria of >140/90 mm HG and proteinuria concentrations of 30 mg/dL or 1+ on two or more urine dipsticks                                                                                |

| Study                      | Social Factors and Pre-Existing Medical                                                                                                                                                                                                                                                                                     |                                                                                                                                                                                                               | Exposure Assessment of Air Pollution                                                                  |                                                                                                                                                                                                                                                                                                                                                                                                                                                                                                                                                                                                 | Outcome(s)                                                                                                       | Case Ascertainment Method                                                                                                                                                                                                                                                                                                                                                                                |
|----------------------------|-----------------------------------------------------------------------------------------------------------------------------------------------------------------------------------------------------------------------------------------------------------------------------------------------------------------------------|---------------------------------------------------------------------------------------------------------------------------------------------------------------------------------------------------------------|-------------------------------------------------------------------------------------------------------|-------------------------------------------------------------------------------------------------------------------------------------------------------------------------------------------------------------------------------------------------------------------------------------------------------------------------------------------------------------------------------------------------------------------------------------------------------------------------------------------------------------------------------------------------------------------------------------------------|------------------------------------------------------------------------------------------------------------------|----------------------------------------------------------------------------------------------------------------------------------------------------------------------------------------------------------------------------------------------------------------------------------------------------------------------------------------------------------------------------------------------------------|
|                            | Conditions                                                                                                                                                                                                                                                                                                                  | Exposure Assessment of Social Factors                                                                                                                                                                         | PM and Ozone Metric                                                                                   | Metric                                                                                                                                                                                                                                                                                                                                                                                                                                                                                                                                                                                          |                                                                                                                  |                                                                                                                                                                                                                                                                                                                                                                                                          |
| Vinikoor-Imler et al. 2012 | Interaction of PM and neighborhood deprivation index (NDI) category using loglikelihood test. NDI by census tract constructed from % households in poverty, % female-headed households, % household income <\$30,000, % households on public assistance, % males in management, % crowded households, % unemployed, % <high | North Carolina (NC) Detailed Birth Record data were used for covariates age, education, race/ethnicity, marital stats, parity and smoking status; NDI from tract-level data from 2000 US Census               | Air pollution averaged over entire pregnancy and restricted to women residing <20 km of PM monitor    | US Environmental Protection Agency (EPA) Air Quality System (AQS) monitors on every 1st, 3rd, or 6th day and closest single monitor linked to maternal address; birth date and gestational age from birth records used to estimate gestational period; women excluded if >20 km from an AQS monitor (excluded 146,907 women, 37% of geocoded women)                                                                                                                                                                                                                                             | Gestational hypertension (GH), PE                                                                                | NC State Center for Health Statistics Detailed Birth Record data were obtained for outcome(s) and maternal address for geocoding; women excluded if geocoded address not available or air quality monitoring <75% complete; excluded multiple births, infants with congenital abnormalities, birth weight <400 g, gestational age <24 or >42 weeks, and mothers with chronic hypertension (HT)           |
| Lee et al. 2012            | Stratification by race/ethnicity (Caucasian and African American)                                                                                                                                                                                                                                                           | Subjects selected from the Prenatal Exposures and Preeclampsia Prevention Study, which included prenatal care before 16 weeks of gestation, variables obtained from interviews and baseline medical histories | Ozone and PM using space/time kriging to estimate zip code level exposures for a trimester (12 weeks) | Zipcode centroid data based on US EPA AQS data for Allegheny County and within 50 km of county boundary (15 stations for ozone, 23 stations monitoring 1st, 3rd, or 6th day for PM); used space-time ordinary kriging to estimate daily air pollution at each centroid of a 13.4 km <sup>2</sup> grid; used ultrasound at each clinic visit to estimate gestational age and date of infant delivery; calculated exposure during each trimester by averaging the concentration at each centroid of the grid within each zip code; 109 zip codes in county with mean area of 16.8 km <sup>2</sup> | Increase in systolic blood pressure (SBP) and diastolic blood pressure (DBP) between 20 weeks and late pregnancy | Medical records from the Prenatal Exposures and Preeclampsia Prevention Study; BP taken by clinic nursing staff with the patient seated and the cuff at the level of the subject's heart. Excluded women with chronic HT and diabetes (n=32), those without BP measurements before 20 weeks of gestation; those outside of Allegheny County, and multiparous women previously surveyed (excluded n=1684) |
| Lee et al. 2013            | Stratification by race/ethnicity (Caucasian and African American)                                                                                                                                                                                                                                                           | Data from Magee Obstetric Medical and Infant (MOMI) database, from Magee Women's Hospital medical records                                                                                                     | Ozone and PM using space/time kriging to estimate zip code level exposures for a trimester (12 weeks) | Zipcode centroid data based on US EPA AQS data for Allegheny County and within 50 km of county boundary (15 stations for ozone, 23 stations monitoring 1st, 3rd, or 6th day for PM); used space-time ordinary kriging to estimate daily air pollution at each centroid of a 13.4 km <sup>2</sup> grid; used ultrasound at each clinic visit to estimate gestational age and date of infant delivery; calculated exposure during each trimester by averaging the concentration at each centroid of the grid within each zip code; 109 zip codes in county with mean area of 16.8 km <sup>2</sup> | PE, GH                                                                                                           | Data from Magee Women's Hospital MOMI medical records database. Excluded multiple births, those with chronic HT, diabetes, gestation <15 or >45 weeks, or residential zip code outside of Allegheny county (excluded n=34,705)                                                                                                                                                                           |



| Study                | Social Factors and Pre-Existing Medical Conditions                                                                                                                                                                       |                                                                                                                                                                                              | Exposure Assessment of Social Factors                                                                                                                                                                                                                                                           | Exposure Assessment of Air Pollution                                                                                                                                                                                                                                                                                                                                                                                                                                                                                                       |                                           | Outcome(s)                                                                                                                                                                                                                                                                                                                                                                                                                                                                                                                                                                                                                                                                                                                                                                                                                                                                                                                                                                                                                                                                                                                                                                                             | Case Ascertainment Method |
|----------------------|--------------------------------------------------------------------------------------------------------------------------------------------------------------------------------------------------------------------------|----------------------------------------------------------------------------------------------------------------------------------------------------------------------------------------------|-------------------------------------------------------------------------------------------------------------------------------------------------------------------------------------------------------------------------------------------------------------------------------------------------|--------------------------------------------------------------------------------------------------------------------------------------------------------------------------------------------------------------------------------------------------------------------------------------------------------------------------------------------------------------------------------------------------------------------------------------------------------------------------------------------------------------------------------------------|-------------------------------------------|--------------------------------------------------------------------------------------------------------------------------------------------------------------------------------------------------------------------------------------------------------------------------------------------------------------------------------------------------------------------------------------------------------------------------------------------------------------------------------------------------------------------------------------------------------------------------------------------------------------------------------------------------------------------------------------------------------------------------------------------------------------------------------------------------------------------------------------------------------------------------------------------------------------------------------------------------------------------------------------------------------------------------------------------------------------------------------------------------------------------------------------------------------------------------------------------------------|---------------------------|
|                      | Existing Medical Conditions                                                                                                                                                                                              | Exposure Assessment of Social Factors                                                                                                                                                        | PM and Ozone Metric                                                                                                                                                                                                                                                                             | Metric                                                                                                                                                                                                                                                                                                                                                                                                                                                                                                                                     |                                           |                                                                                                                                                                                                                                                                                                                                                                                                                                                                                                                                                                                                                                                                                                                                                                                                                                                                                                                                                                                                                                                                                                                                                                                                        |                           |
| Miranda et al. 2013  | Education, race/ethnicity, poverty (community census tract-level), income, population density; excluded women with chronic hypertension from study                                                                       | 2000 US Census data                                                                                                                                                                          | PM mixture: Proximity to traffic measured by GIS residence <250 m, 250-500, >500m from roadway, traffic volume or density of roadways not included                                                                                                                                              | Used linear distance between geocoded residential address at delivery and nearest major roadway using 2006 Second edition Topologically Integrated Geographic Encoding and Reference (TIGER) streets data using A1, A2, and A3 major roads; did not estimate air quality                                                                                                                                                                                                                                                                   | PE and/or GH                              | NC State Center for Health Statistics Detailed Birth Record data to determine outcome(s) and maternal address for geocoding (more than 50%). Records excluded if geocoded address not available; excluded multiple births, infants with congenital abnormalities, birth weight <400 g, gestational age <24 or >42 weeks, or those with missing covariates; included only non-Hispanic white, non-Hispanic Black and Hispanic women                                                                                                                                                                                                                                                                                                                                                                                                                                                                                                                                                                                                                                                                                                                                                                     |                           |
| Mobasher et al. 2013 | Obesity category (BMI $\geq 30$ kg/m <sup>2</sup> )                                                                                                                                                                      | Hospital records at time of delivery                                                                                                                                                         | O <sub>3</sub> , PM <sub>2.5</sub> , PM <sub>10</sub> trimester averages from 24-hour average based on residential address using EPA Air Quality System and the Southern California Children's Health Study. Ozone was correlated with PM <sub>2.5</sub> but uncorrelated with PM <sub>10</sub> | US EPA AQS monitors and the Southern California Children's Health Study (CHS); 22-30 monitors for ozone and gaseous pollutants; 20-23 PM monitors with 1,3, and 6th day monitoring standardized to Federal Reference methods; monitor must meet 75% completeness criteria to be used; where AQS and CHS monitors overlapped, CHS monitors were used due to higher level of QA; inverse distance squared weighting of concentration from closest 4 stations within 50 km of residence using data from same stations across entire pregnancy | Hypertensive disorders of pregnancy (HDP) | Cases and controls recruited retrospectively from delivery logs at Los Angeles County, University of Southern California Women's Hospital and Children's Hospital; excluding HT among controls; mild PE defined as SBP >140 mm Hg or DBP >90 mm Hg on 2 or more occasions at least 6 hours apart plus proteinuria >300 mg/dL in 24-hr urine collection or +1 on a dipstick in women who were normotensive at <20 weeks of gestation; severe PE defined as SBP >160 mm Hg or DBP >110 mm Hg on 2 or more occasions at least 6 hours apart plus proteinuria >500 mg/dL in 24-hr urine collection or +3 on a dipstick; GH was BP (mild or severe) without evidence of proteinuria; eclampsia defined as HT with or without proteinuria plus at least one observed seizure disorder; Hemolysis Elevated Liver Enzyme Low Platelet count syndrome defined as hemolysis, elevated liver enzymes >70 IU/L, and low platelets <100,000 nm <sup>3</sup> . Partial HELLP as two of the previous three conditions; women with lupus, chronic renal disease, multiple gestations or sickle cell disease/trait were excluded; pregnancy period defined by date of last menstrual period and ultrasound measurements |                           |
| Xu et al. 2014       | Multiple pollutants at low concentrations, and stratified by race/ethnicity (Non-Hispanic White, non-Hispanic Black, Others), diabetes status, and education status (< high school, high school graduate, > high school) | Variables constructed into categories using birth record data obtained from the Bureau of Vital Statistics and Office of Health Statistics and Assessment, Florida (FL) Department of Health | Closest EPA AQS PM monitor <20 km distance (note only 2 active PM2.5 and 2 ozone monitors); ozone and PM2.5 correlation 0.20                                                                                                                                                                    | US EPA AQS data (2 ozone, 2 PM <sub>2.5</sub> monitors, 3 PM <sub>10</sub> monitors); closest single monitor used within 20 km; no completeness criteria reported                                                                                                                                                                                                                                                                                                                                                                          | HDP (GH, PE or Eclampsia)                 | Birth record data obtained from the Bureau of Vital Statistics and Office of Health Statistics and Assessment, FL Department of Health; excluded infants with congenital abnormalities, birthweight <400g or gestational age <24 or >42 weeks; women were excluded who had plural deliveries, previous pre-term births, chronic HT or lack of geocoded address                                                                                                                                                                                                                                                                                                                                                                                                                                                                                                                                                                                                                                                                                                                                                                                                                                         |                           |

| Study                                                                                   | Social Factors and Pre-Existing Medical Conditions                                                                                                                                                                                                                                                              | Exposure Assessment of Social Factors                                                                                                                                                                                    | PM and Ozone Metric                                                                                                                             | Exposure Assessment of Air Pollution Metric                                                                                                                                                                                                                                                                                                                                                                                                                                                                                                                                                                                                                                                                                                          | Outcome(s)                                                                  | Case Ascertainment Method                                                                                                                                                                                                                                                                                                                                                                                                                                                                                                                                                                |
|-----------------------------------------------------------------------------------------|-----------------------------------------------------------------------------------------------------------------------------------------------------------------------------------------------------------------------------------------------------------------------------------------------------------------|--------------------------------------------------------------------------------------------------------------------------------------------------------------------------------------------------------------------------|-------------------------------------------------------------------------------------------------------------------------------------------------|------------------------------------------------------------------------------------------------------------------------------------------------------------------------------------------------------------------------------------------------------------------------------------------------------------------------------------------------------------------------------------------------------------------------------------------------------------------------------------------------------------------------------------------------------------------------------------------------------------------------------------------------------------------------------------------------------------------------------------------------------|-----------------------------------------------------------------------------|------------------------------------------------------------------------------------------------------------------------------------------------------------------------------------------------------------------------------------------------------------------------------------------------------------------------------------------------------------------------------------------------------------------------------------------------------------------------------------------------------------------------------------------------------------------------------------------|
|                                                                                         |                                                                                                                                                                                                                                                                                                                 |                                                                                                                                                                                                                          |                                                                                                                                                 |                                                                                                                                                                                                                                                                                                                                                                                                                                                                                                                                                                                                                                                                                                                                                      |                                                                             |                                                                                                                                                                                                                                                                                                                                                                                                                                                                                                                                                                                          |
| Savitz et al. 2015                                                                      | BMI, education, SES (based on government insurance eligibility), social deprivation index (SDI) comprised of % with college degree, % unemployment, % management/ professional occupation, % residential crowding, % below 200% of the federal poverty line, % of households receiving public assistance, and % | Birth certificates were linked to hospital discharge data from the New York (NY) State Department of Health Statewide Planning and Research Cooperative System                                                           | PM <sub>2.5</sub> at maternal residence by trimester                                                                                            | Used city-wide spatial variation followed by temporal adjustment to match to gestational exposure period using 150 monitoring stations from NY Community Air Survey and regression of GIS buffers of emissions and land use variables to construct estimates within 300 m of each maternal address (R <sup>2</sup> PM <sub>2.5</sub> 0.83)                                                                                                                                                                                                                                                                                                                                                                                                           | mild PE, severe PE, GH, and total hypertensive disorders of pregnancy (HDP) | Birth certificates were linked to hospital discharge data from the NY State Department of Health Statewide Planning and Research Cooperative System; women were excluded who had plural deliveries or were smokers or had pre-pregnancy HT; excluded birthweights <500 g or >5,000 g, or missing covariate information; used International Classification of Diseases (ICD-9-CM); used clinical estimates using ultrasound to establish pregnancy period                                                                                                                                 |
| Männistö et al. 2015 Consortium on Safe Labor                                           | Interaction between previous hypertensive disorder diagnosis (PE, GH,) and (0 hour, 1-4 hour lag) lagged air pollution prior to BP measurement                                                                                                                                                                  | Electronic medical records from Consortium on Safe Labor from 19 US hospitals using ICD-9 codes; women considered normotensive if they had no indication of HDP                                                          | Ozone, PM <sub>2.5</sub> , PM <sub>10</sub> , elemental carbon, NO <sub>x</sub> , SO <sub>2</sub> , CO (0 hour, 1-4 hour lag before BP reading) | Modeled pollution with Community Multi-Scale Air Quality (CMAQ) 36 km grid fused with inverse-distance weighted US EPA AQS monitored data; 0-4 hour pre-admission period; no adjustment for long-term air pollution; Hourly exposure estimates were averaged across the delivery hospital referral region and weighted for population density to estimate windows of exposure for each pregnancy as a proxy for maternal residence and local mobility. The size of hospital referral regions ranged from 415 to 312,644 km <sup>2</sup>                                                                                                                                                                                                              | Hypertensive blood pressure (BP) upon admission to labor and delivery       | Clinical BP was measured by hospital staff upon admission to labor/delivery using standard equipment; normal BP defined as SBP <120 mm Hg and DBP < 80 mm Hg; high normal BP defined as SBP 120-139 mm Hg and DBP <90 mm Hg or DBP 80-89 mm Hg and SBP <140 mm Hg; mild hypertension defined as SBP 140-149 mm Hg and DBP <100 mm Hg or DBP 90-99 mm Hg and SBP <150 mm Hg; moderate hypertension defined as SBP 150-159 mm Hg and DBP <110 mm Hg or DBP 100-109 mm Hg and SBP <160 mm Hg; severe hypertension SBP >160 mm Hg (with any diastolic) or DBP >110 mm Hg (with any systolic) |
| Mendola et al. 2016 Consortium on Safe Labor/ Air Quality and Reproductive Health Study | Asthma and obesity                                                                                                                                                                                                                                                                                              | Electronic medical records from Consortium on Safe Labor from 19 US hospitals using maternal discharge summary and ICD-9 codes; asthma diagnosis was recorded in medical record or discharge summary (ICD-9 493.0-493.9) | Ozone, PM <sub>2.5</sub> , PM <sub>10</sub> , elemental carbon, NO <sub>x</sub> , SO <sub>2</sub> , CO                                          | Modeled pollution with CMAQ 36 km grid fused with inverse-distance weighted US EPA AQS monitored data; hourly exposure averaged across hospital referral region and weighted for population density as proxy for maternal residence; pre-conception period was 90 days prior to last menstrual period based on best obstetrical estimate of gestational age; hourly exposure estimates were averaged across the delivery hospital referral region and weighted for population density to estimate windows of exposure for each pregnancy as a proxy for maternal residence and local mobility; the size of hospital referral regions ranged from 415 to 312,644 km <sup>2</sup> ; used temporal changes, not geographic differences in air pollution | PE                                                                          | Electronic medical records from Consortium on Safe Labor from 19 US hospitals using maternal discharge summary and ICD-9 codes (642.4 mild or unspecified, 642.5 severe); excluded multi-fetal pregnancies, women with chronic HT, GH, and superimposed PE to compare PE cases to normotensive reference group                                                                                                                                                                                                                                                                           |

**Table S3. Summary of Studies Examining Joint Effect of Air Pollution and Social Determinants of Health in Associations with HDP in U.S.**

| Social Determinant of Health (SDoH)                                                                                                      | Study                      | Analysis                                                                                                                                                                                                                                                                                                                                                                                 | Pollutant                                                                                   | Result                                                                                                                                                                                                                                                                                                                                                                                                                                                               |
|------------------------------------------------------------------------------------------------------------------------------------------|----------------------------|------------------------------------------------------------------------------------------------------------------------------------------------------------------------------------------------------------------------------------------------------------------------------------------------------------------------------------------------------------------------------------------|---------------------------------------------------------------------------------------------|----------------------------------------------------------------------------------------------------------------------------------------------------------------------------------------------------------------------------------------------------------------------------------------------------------------------------------------------------------------------------------------------------------------------------------------------------------------------|
| Poverty (SES, education, Neighborhood Deprivation Index (NDI), median housing value, individual and neighborhood or county-level income) | Wu et al. 2009             | Poverty, insurance type (income-tested); stratification                                                                                                                                                                                                                                                                                                                                  | Traffic-related modeled PM <sub>2.5</sub>                                                   | Greater odds of preeclampsia (PE) among privately insured v. public insurance, but authors indicate results likely confounded by maternal age; no difference in association when stratified by poverty                                                                                                                                                                                                                                                               |
|                                                                                                                                          | Wu et al. 2011             | Poverty, (% living below poverty level based on U.S. Census block group for 2000); insurance type (income-tested); stratification                                                                                                                                                                                                                                                        | Ozone, PM <sub>2.5</sub> , PM <sub>10</sub> , and Traffic-related modeled PM <sub>2.5</sub> | No difference in association for PE, detailed results not presented                                                                                                                                                                                                                                                                                                                                                                                                  |
|                                                                                                                                          | Vinikoor-Imler et al. 2012 | Neighborhood deprivation index (NDI) from census tract-level percent households in poverty, percent female-headed households with dependents, percent households income <\$30,000, percent households on public assistance, percent of males in management or professional occupation, percent living in crowded housing, percent unemployed, percent without high school (HS) education | PM <sub>2.5</sub>                                                                           | Independent effect of NDI on GH: Adjusting for PM <sub>2.5</sub> and covariates, the relative risk (RR) of gestational hypertension (GH) for a women with a NDI in the 4th compared to 1st quartile 1.24 (1.14, 1.35)<br><br>No difference in gestational hypertension (GH)-PM <sub>2.5</sub> RR for each IQR 2.25 µg/m <sup>3</sup> among women in areas with lowest NDI 1.08 (1.02, 1.14) and 1.12 (1.08, 1.17) for upper 75% of NDI (interaction p=0.24)          |
|                                                                                                                                          |                            | Education category as independent risk factor                                                                                                                                                                                                                                                                                                                                            | PM <sub>10</sub>                                                                            | Independent effect of NDI on GH: Adjusting for PM <sub>10</sub> and covariates, the RR for a women with a NDI in the 4th compared to 1st quartile 1.27 (1.16, 1.39)<br><br>Higher GH-PM <sub>10</sub> RR among those with higher NDI; PM <sub>10</sub> RR for each IQR among women in areas with lowest NDI 1.02 (0.98, 1.07) and 1.10 (1.06, 1.14) for upper 75% NDI (interaction p<0.05)                                                                           |
|                                                                                                                                          |                            |                                                                                                                                                                                                                                                                                                                                                                                          | PM <sub>2.5</sub>                                                                           | Independent effect of education on GH: Adjusting for PM <sub>2.5</sub> and covariates, the RR of GH for a women who completed college is lower than a women who completed HS 0.71 (0.67, 0.76); No association among other categories; similar findings for PM <sub>10</sub> models                                                                                                                                                                                  |
|                                                                                                                                          | Xu et al. 2014             | Education category, stratified by education status (< HS, HS graduate, > HS)                                                                                                                                                                                                                                                                                                             | Ozone                                                                                       | No associations with hypertensive disorders of pregnancy (HDP) in any education category in adjusted models for 1st or 2nd trimester or for entire pregnancy                                                                                                                                                                                                                                                                                                         |
|                                                                                                                                          |                            |                                                                                                                                                                                                                                                                                                                                                                                          | PM <sub>2.5</sub>                                                                           | Women with lower education have lower HDP odds ratio (OR) for entire pregnancy and 1st trimester exposure compared to > HS: PM <sub>2.5</sub> OR entire pregnancy < HS 1.10 (0.79, 1.54), HS 1.18 (0.93, 1.49), > HS 1.32 (1.10, 1.58); 1st trimester < HS 1.08 (0.83, 1.39) HS 0.98 (0.81, 1.17), > HS 1.19 (1.03, 1.37); women with lower education have higher OR for 2nd trimester exposure: <HS 1.16 (0.83, 1.62), HS 1.31 (1.05, 1.63), > HS 1.30 (1.10, 1.54) |
|                                                                                                                                          | Savitz et al. 2015         | NDI from census tract-level percent households below 200% poverty line, percent households on public assistance, percent in management or professional occupation, percent residential crowding, percent unemployed, percent with college degree and percent nonwhite race                                                                                                               | PM <sub>2.5</sub>                                                                           | No association with PE or GH when adjusting for hospital; interaction not reported                                                                                                                                                                                                                                                                                                                                                                                   |
| Race/ethnicity                                                                                                                           | Wu et al. 2009             | Stratified by race/ ethnicity based on hospital birth records (African American, Hispanic, Asian, White, Other)                                                                                                                                                                                                                                                                          | Traffic-related modeled PM <sub>2.5</sub>                                                   | No difference in association for PE, detailed results not presented                                                                                                                                                                                                                                                                                                                                                                                                  |
|                                                                                                                                          | Wu et al. 2009             | Stratified by race/ ethnicity based on hospital birth records (African American, Hispanic, Asian, White, Other)                                                                                                                                                                                                                                                                          | Ozone, PM <sub>2.5</sub> , PM <sub>10</sub> , and Traffic-related modeled PM <sub>2.5</sub> | No difference in association for PE, detailed results not presented                                                                                                                                                                                                                                                                                                                                                                                                  |
|                                                                                                                                          | Lee et al. 2012            | Stratified by race/ ethnicity in hospital-based cohort (Caucasian, African American)                                                                                                                                                                                                                                                                                                     | Ozone<br>PM <sub>10</sub>                                                                   | Results of interaction not reported for blood pressure (BP)<br><br>No difference in association for BP by race category: PM <sub>10</sub> IQR associated with 1.13 mm Hg (-0.26, 2.52) among Caucasian pregnant women and 1.11 mm Hg (-1.24, 3.46) among African American pregnant women; interaction p-value not reported                                                                                                                                           |

| Social Determinant of Health (SDoH) | Study                      | Analysis                                                                                             | Pollutant                                                                                   | Result                                                                                                                                                                                                                                                                                                                                                                                                                 |                                                                                                                                |
|-------------------------------------|----------------------------|------------------------------------------------------------------------------------------------------|---------------------------------------------------------------------------------------------|------------------------------------------------------------------------------------------------------------------------------------------------------------------------------------------------------------------------------------------------------------------------------------------------------------------------------------------------------------------------------------------------------------------------|--------------------------------------------------------------------------------------------------------------------------------|
| Race/ethnicity                      | Lee et al. 2013            | Stratified by race/ ethnicity in hospital-based cohort (Caucasian, African American)                 | Ozone                                                                                       | Positive association with lower confidence bound intersecting 1.0 for PE and for GH                                                                                                                                                                                                                                                                                                                                    |                                                                                                                                |
|                                     |                            |                                                                                                      | PM <sub>2.5</sub>                                                                           | PM <sub>2.5</sub> associated with PE in Caucasian (OR= 1.21 (0.99, 1.50) cases = 467 but not African American women (OR 0.93 (0.72, 1.20) cases = 200                                                                                                                                                                                                                                                                  |                                                                                                                                |
|                                     |                            |                                                                                                      | PM <sub>10</sub>                                                                            | Positive association with lower confidence bound intersecting 1.0 for PE and for GH<br>Suggestive evidence that PM <sub>10</sub> association with GH was greater among African American women OR 1.27 (1.01, 1.60) cases =366 than Caucasian women OR 1.03 (0.91, 1.16) cases = 1,655, but not formally tested                                                                                                         |                                                                                                                                |
|                                     | Xu et al. 2014             | Stratified by race/ethnicity (Non-Hispanic White, non-Hispanic Black, Others) based on birth records | Ozone                                                                                       | Positive association with HDP but CI overlaps with 1.0 for 1st trimester among non-Hispanic White and Others but not among non-Hispanic Black; otherwise no associations with HDP in any race category in adjusted models for 2nd trimester or entire pregnancy                                                                                                                                                        |                                                                                                                                |
|                                     |                            |                                                                                                      | PM <sub>2.5</sub>                                                                           | HDP OR higher among Others and non-Hispanic White compared with non-Hispanic Black: PM <sub>2.5</sub> OR for entire pregnancy among non-Hispanic White 1.35 (1.13, 1.61), among non-Hispanic Black 1.00 (0.080, 1.26), and Others 1.59 (1.04, 2.44); Similar but nonsignificant results for 1st trimester; 2nd trimester non-Hispanic whites 1.29 (1.10, 1.52), Blacks 1.16 (0.94, 1.43), and Others 1.80 (1.20, 2.71) |                                                                                                                                |
|                                     | Mobasher et al. 2013       | Primarily Hispanic White women (> 96%) in case-control study                                         | Ozone                                                                                       | Although no direct comparison among racial or ethnic groups, HDP OR per 15 ppb ozone increase 1st trimester 0.91 (0.54, 1.52), 2nd trimester 2.05 (1.22, 3.46), 3rd trimester 1.19 (0.71, 1.98)                                                                                                                                                                                                                        |                                                                                                                                |
|                                     |                            |                                                                                                      | PM <sub>2.5</sub>                                                                           | Although no direct comparison among racial or ethnic groups, HDP associations are higher than reported in other studies: PM <sub>2.5</sub> OR per 7 µg/m <sup>3</sup> 1st trimester 3.94 (1.82, 8.55), 2nd trimester 1.86 (0.95, 3.63), 3rd trimester 1.44 (0.76, 2.70)                                                                                                                                                |                                                                                                                                |
|                                     |                            |                                                                                                      | PM <sub>10</sub>                                                                            | No association or with PM <sub>10</sub> ; HDP OR 1st trimester 0.76 (0.43, 1.36), 2nd trimester 0.76 (0.44, 1.32), 3rd trimester 1.41 (0.77, 2.57)                                                                                                                                                                                                                                                                     |                                                                                                                                |
|                                     | Vinikoor-Imler et al. 2012 | Race/ethnicity as independent risk factor                                                            | PM <sub>2.5</sub>                                                                           | Adjusting for PM <sub>2.5</sub> and covariates, GH RR higher among non-Hispanic black compared to non-Hispanic white women 1.15 (1.10, 1.21); GH RR lower among Hispanics compared to non-Hispanic white women 0.67 (0.61, 0.73); similar associations in PM <sub>10</sub> models                                                                                                                                      |                                                                                                                                |
|                                     | Pyscho-social Stress       | n/a                                                                                                  |                                                                                             |                                                                                                                                                                                                                                                                                                                                                                                                                        |                                                                                                                                |
|                                     | Access to Nutrition        | n/a                                                                                                  |                                                                                             |                                                                                                                                                                                                                                                                                                                                                                                                                        |                                                                                                                                |
|                                     | Access to Healthcare       | Wu et al. 2009                                                                                       | Insurance type (private v. government-sponsored means-tested)                               | Traffic-related modeled PM <sub>2.5</sub>                                                                                                                                                                                                                                                                                                                                                                              | Greater odds of PE among privately insured v. public insurance, but authors indicate results likely confounded by maternal age |
| Wu et al. 2011                      |                            | Insurance type (private v. government-sponsored means-tested)                                        | Ozone, PM <sub>2.5</sub> , PM <sub>10</sub> , and Traffic-related modeled PM <sub>2.5</sub> | No difference in PE-air pollution OR, detailed results not reported                                                                                                                                                                                                                                                                                                                                                    |                                                                                                                                |

**Table S4. Summary of Studies Examining Joint Effect of Air Pollution and Pre-Existing Chronic Health Condition in Associations with HDP in U.S.**

| Chronic Condition         | Study                      | Analysis                                                                                                                                                | Pollutant(s)           | Result                                                                                                                                                                                                                                                                                                                                                        |
|---------------------------|----------------------------|---------------------------------------------------------------------------------------------------------------------------------------------------------|------------------------|---------------------------------------------------------------------------------------------------------------------------------------------------------------------------------------------------------------------------------------------------------------------------------------------------------------------------------------------------------------|
| Obesity                   | Rudra et al. 2011          | Stratify by BMI <25 kg/m <sup>2</sup>                                                                                                                   | PM <sub>2.5</sub>      | No preeclampsia (PE) effect modification (p-value not reported, defined interaction as difference across strata of > 20%)                                                                                                                                                                                                                                     |
|                           | Mobasher et al. 2013       | Likelihood ratio test for interaction for BMI ≥ 30 kg/m <sup>2</sup>                                                                                    | Ozone                  | Lower HDP odds ratio (OR) with obesity in 3rd trimester (interaction p=0.04) but not in 1st or 2nd; Non-obese OR 1.44 (0.77, 2.70) and obese 1.03 (0.37, 2.91); authors note that exposure misclassification during 3rd trimester is a concern because exposure assigned to women diagnosed during 3rd trimester covered both pre- and post-diagnosis periods |
|                           |                            |                                                                                                                                                         | PM <sub>2.5</sub>      | Lower HDP OR with obesity in 1st trimester (interaction p=0.06) but not in 2nd or 3rd; Non-obese OR 8.63 (3.10, 24.14) and Obese 1.39 (0.34, 5.60) per 7 ug/m <sup>3</sup> increase                                                                                                                                                                           |
|                           |                            |                                                                                                                                                         | PM <sub>10</sub>       | No interaction with obesity in association with HDP; consistent with no association in main effect                                                                                                                                                                                                                                                            |
| Mendola et al. 2016       | BMI ≥ 30 kg/m <sup>2</sup> | Ozone, PM <sub>2.5</sub> , PM <sub>10</sub>                                                                                                             | No association with PE |                                                                                                                                                                                                                                                                                                                                                               |
| Gestational Diabetes      | Xu et al. 2014             | Gestational Diabetes (GD); stratification                                                                                                               |                        | Suggestive evidence for all hypertensive disorders of pregnancy (HDP), but small sample size hinders interpretation (cases with GD n= 58)                                                                                                                                                                                                                     |
|                           |                            |                                                                                                                                                         | Ozone                  | Ozone-HDP OR entire pregnancy among those with GD 1.53 (0.92, 2.61) v. nonGD 0.95 (0.85, 1.08); 1st trimester with GD 1.09 (0.56, 2.20) v. nonGD 0.99 (0.83, 1.19); 2nd trimester with GD 1.18 (0.68, 2.01) v. nonGD 0.92 (0.80, 1.05)                                                                                                                        |
|                           |                            |                                                                                                                                                         | PM <sub>2.5</sub>      | PM <sub>2.5</sub> -HDP OR entire pregnancy among those with GD 1.45 (0.82, 2.64) v. nonGD 1.23 (1.06, 1.42); 1st trimester with GD 1.53 (0.96, 2.50) v. nonGD 1.08 (0.96, 1.21); 2nd trimester with GD 1.05 (0.65, 1.69) v. 1.31 (1.15, 1.49)                                                                                                                 |
| Diabetes                  | Wu et al. 2009             | Diabetes, stratification                                                                                                                                | PM <sub>2.5</sub>      | No difference in PM <sub>2.5</sub> -PE association; only NOx OR reported                                                                                                                                                                                                                                                                                      |
| Asthma                    | Mendola et al. 2016        | Asthma status; test for interaction                                                                                                                     | Ozone                  | No association with PE and no difference in association by asthma status                                                                                                                                                                                                                                                                                      |
|                           |                            |                                                                                                                                                         | PM <sub>2.5</sub>      | No association with PE and no difference in association by asthma status                                                                                                                                                                                                                                                                                      |
|                           |                            |                                                                                                                                                         | PM <sub>10</sub>       | No association with PE and no difference in association by asthma status                                                                                                                                                                                                                                                                                      |
|                           |                            |                                                                                                                                                         | Elemental carbon       | Greater PE RR among those with asthma for entire pregnancy 1.11 (1.03, 1.21) v. those without asthma 1.03 (0.99, 1.06) (interaction p<0.05)                                                                                                                                                                                                                   |
| Gestational Hypertension  | Männistö et al. 2015       | Among those with gestational hypertension (GH), odds of higher BP category upon admission after 4-hour lag air pollution exposure; test for interaction | Ozone                  | No difference in negative association with BP category; with GH 0.98 (0.96, 1.00); compared to normotensive 0.997 (0.99, 0.99)                                                                                                                                                                                                                                |
|                           |                            |                                                                                                                                                         | PM <sub>2.5</sub>      | No association and no difference in association with BP category                                                                                                                                                                                                                                                                                              |
|                           |                            |                                                                                                                                                         | PM <sub>10</sub>       | No association and no difference in association with BP category                                                                                                                                                                                                                                                                                              |
| Preeclampsia              | Männistö et al. 2015       | Among those with PE, odds of higher BP category upon admission after 4-hour lag air pollution exposure; test for interaction                            | Ozone                  | Greater negative association with BP category; with PE 0.979 (0.965, 0.993) (interaction p<0.05); compared to normotensive 0.997 (0.99, 1.00)                                                                                                                                                                                                                 |
|                           |                            |                                                                                                                                                         | PM <sub>2.5</sub>      | No association and no difference in association with BP category                                                                                                                                                                                                                                                                                              |
|                           |                            |                                                                                                                                                         | PM <sub>10</sub>       | Greater positive association with BP category; with PE 1.025 (1.003, 1.047) (interaction p<0.05); compared to normotensive 0.998 (0.99, 1.00)                                                                                                                                                                                                                 |
| Chronic Hypertension      | Männistö et al. 2015       | Among those with chronic hypertension (HT), odds of higher BP category upon admission after 4-hour lag air pollution exposure; test for interaction     | Ozone                  | No association with BP category and no difference in association by chronic HT                                                                                                                                                                                                                                                                                |
|                           |                            |                                                                                                                                                         | PM <sub>2.5</sub>      | No association with BP category and no difference in association by chronic HT                                                                                                                                                                                                                                                                                |
|                           |                            |                                                                                                                                                         | PM <sub>10</sub>       | No association with BP category and no difference in association by chronic HT                                                                                                                                                                                                                                                                                |
| Superimposed Preeclampsia | Männistö et al. 2015       | Among those with superimposed PE, odds of higher BP category upon admission after air pollution exposure; test for interaction                          | Ozone                  | Greater positive association with BP category; with superimposed PE 1.080 (1.029, 1.132) (interaction p<0.05); compared to normotensive 0.997 (0.99, 1.00)                                                                                                                                                                                                    |
|                           |                            |                                                                                                                                                         | PM <sub>2.5</sub>      | No association with BP category and no difference in association by superimposed PE                                                                                                                                                                                                                                                                           |
|                           |                            |                                                                                                                                                         | PM <sub>10</sub>       | No association with BP category and no difference in association by superimposed PE                                                                                                                                                                                                                                                                           |
